# Supplementary material for: Design and syntheses of hybrid supramolecular architectures: based on [Fe(C2O4)3]3− metallotectons and diverse organic cations
Source: Royal Society of Chemistry journal article supplement (doi:10.1039/c4ce00357h), 2014-01-01
Supplement: c4ce00357h1.pdf [file c4ce00357h1.pdf]

# Design and Syntheses of Hybrid Supramolecular Architectures: Based on $[\text{Fe}(\text{C}_2\text{O}_4)_3]^{3-}$ Metallotectons and Diverse Organic Cations

<sup>a</sup> College of Chemistry and Molecular Engineering, Qingdao University of Science and Technology, Qingdao 266042, P. R. China. E-mail: [inorchemwl@126.com](mailto:inorchemwl@126.com); Fax: (+86) 532-840-22681

<sup>b</sup> State Key Laboratory of Inorganic Synthesis and Preparative Chemistry, Jilin University, Changchun, 130012, PR China. E-mail: [kkhuang@jlu.edu.cn](mailto:kkhuang@jlu.edu.cn);

**Figure S1.** The close-packed 3D H-bonded framework of **8** ( $\text{Cl}^-$  and  $\text{H}_2\text{O}$  molecules have been deleted).

**Figure S2.** ORTEP view of the asymmetric unit of  $[\{(\text{H}_2\text{-L}_6)_2\text{Fe}_2(\text{OH})_2(\text{C}_2\text{O}_4)_4\} \cdot 2\text{H}_2\text{O}]$  (**7**) with ellipsoids cut at the 30% probability level.

**Figure S3.** Detail of the connection between ten  $[\text{H-L}_7]^+$  cation and one  $[\text{Fe}(\text{C}_2\text{O}_4)_3]^{3-}$  anion.

**Figure S4.** The close-packed 3D H-bonded framework of **8** ( $\text{Cl}^-$  and  $\text{H}_2\text{O}$  molecules have been deleted).

**Figure S5.** Thermogravimetric analyses (TGA) curves of **2** and **5-8**.

**Figure S6.** IR curves of **1-8**

**Table S1** Hydrogen-Bond Geometries in the Crystal Structures of **1-8**

**Figure S1.** The close-packed 3D H-bonded architecture of **3**. Each independent 2D network is depicted with a different color.

**Figure S2.** ORTEP view of the asymmetric unit of  $[\{(\text{H}_2\text{-L}_6)_2\text{Fe}_2(\text{C}_2\text{O}_4)_4(\text{OH})_2\} \cdot 2\text{H}_2\text{O}]$  (**7**) with ellipsoids cut at the 30% probability level.

**Figure S3.** Detail of the connection between ten  $[\text{H-L}_7]^+$  cation and one  $[\text{Fe}(\text{C}_2\text{O}_4)_3]^{3-}$  anion.

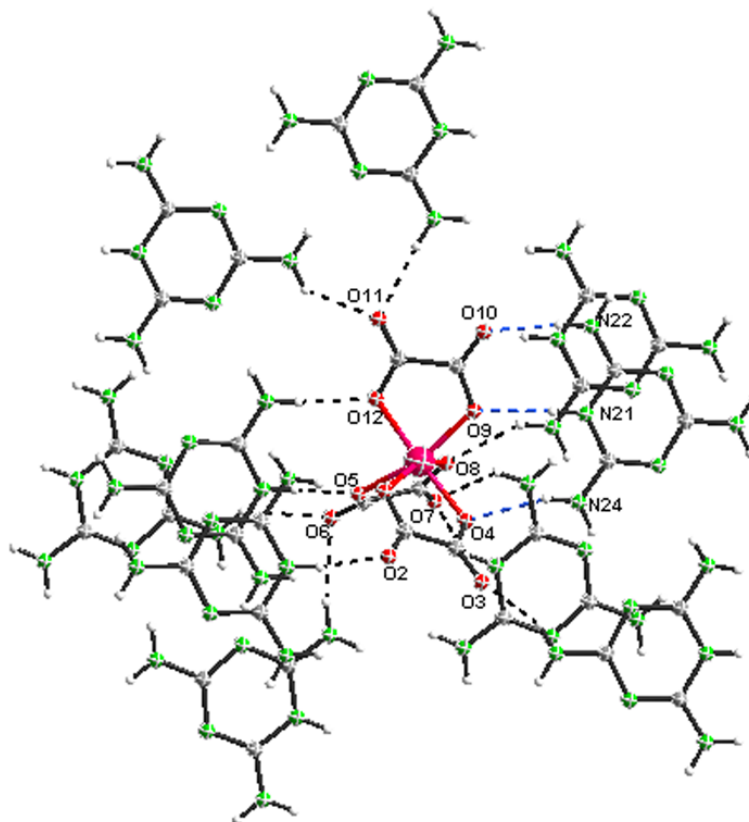

**Figure S4.** The close-packed 3D H-bonded framework of **8** (Cl<sup>-</sup> and H<sub>2</sub>O molecules have been deleted).

**Figure S5.** Thermogravimetric analyses (TGA) curves of **2** and **5-8**.

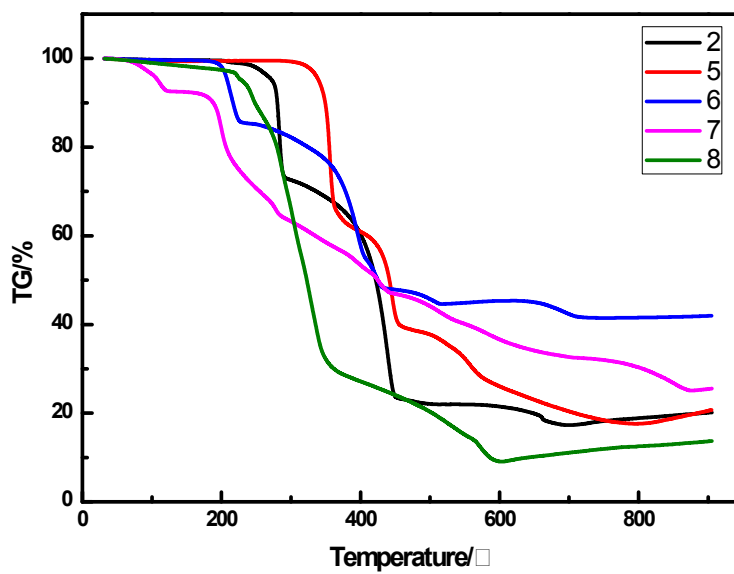

**Table S1** Hydrogen-Bond Geometries in the Crystal Structures of 1-8

| Compound      | D-H...A (Å)    | D-H (Å) | H...A (Å) | D...A (Å) | D-H...A (deg) | symmetry              |
|---------------|----------------|---------|-----------|-----------|---------------|-----------------------|
| 1             | N1-H1...O1     | 0.86    | 1.89      | 2.725     | 162           | -x, y, 1/2-z          |
|               | N2-H2...O7     | 0.86    | 1.85      | 2.710     | 177           | -1/2+x, y, 1-z        |
|               | O7-H7B...O6    | 0.85    | 1.95      | 2.769     | 163           | 1/2-x, -y, z          |
| 2             | N3-H3...O11    | 0.86    | 1.94      | 2.735     | 154           | x, -1+y, z            |
|               | O9-H9A...O7    | 0.85    | 1.98      | 2.819     | 169           |                       |
|               | O9-H9B...O10   | 0.85    | 1.89      | 2.742     | 176           |                       |
|               | O10-H10A...O3  | 0.85    | 2.18      | 2.916     | 145           | x, 1+y, z             |
|               | O10-H10B...O2  | 0.85    | 1.99      | 2.765     | 152           | -x, 1+y, z            |
|               | O11-H11A...O6  | 0.85    | 2.24      | 2.982     | 146           | 1+x, y, z             |
|               | O11-H11A...O7  | 0.85    | 2.43      | 2.920     | 117           | 1+x, y, z             |
|               | O11-H11B...O9  | 0.85    | 1.95      | 2.794     | 170           |                       |
|               | C7-H7...O5     | 0.93    | 2.39      | 3.188     | 143           | 1-x, -y, 1-z          |
|               | C17-H17...O2   | 0.93    | 2.34      | 3.132     | 143           |                       |
| 3             | N1-H1...O4     | 0.86    | 1.81      | 2.660     | 171           |                       |
|               | N3-H3...O4     | 0.88    | 2.13      | 2.788     | 131           | 2-x, 1-y, 2-z         |
|               | N3-H3...O5     | 0.88    | 2.43      | 3.236     | 154           | 2-x, 1-y, 2-z         |
|               | C4-H4B...O5    | 0.97    | 2.51      | 3.362     | 147           | x, y, -1+z            |
|               | C11-H11A...O6  | 0.97    | 2.40      | 3.36      | 170           | 1-x, 1-y, 2-z         |
| 4             | N1-H1...O2     | 0.86    | 2.41      | 3.046     | 131           | -x, y, -1/2-z         |
|               | N1-H1...O3     | 0.86    | 2.03      | 2.786     | 147           | -x, y, -1/2-z         |
|               | C4-H4B...O3    | 0.96    | 2.49      | 3.184     | 129           | -x, y, -1/2-z         |
|               | C6-H6...O6     | 0.93    | 2.53      | 3.101     | 120           | -1/2+x, 1/2+y, -1+z   |
| 5             | N1-H1...O2     | 0.86    | 2.09      | 2.783     | 137           | -x, -y, 1-z           |
|               | N1-H1...O3     | 0.86    | 2.17      | 2.901     | 143           | -x, -y, 1-z           |
|               | O13-H13C...O4  | 0.88    | 2.21      | 3.004     | 151           | -x, y, 1/2-z          |
|               | O13-H13D...O11 | 0.87    | 2.22      | 3.006     | 150           | 1+x, y, z             |
|               | C7-H7...O12    | 0.93    | 2.36      | 3.251     | 161           | 1+x, y, z             |
|               | C16-H16...O7   | 0.93    | 2.37      | 3.017     | 127           | 1/2-x, 1/2-y, 1-z     |
| 6             | N4-H4...O1     | 0.86    | 2.01      | 2.868     | 174           | -1/2+x, 1/2-y, -1/2+z |
|               | C5-H5...O2     | 0.93    | 2.45      | 3.218     | 140           | 1/2+x, -1/2+y, z      |
| 7             | N1-H1A...O5    | 0.89    | 2.07      | 2.875     | 150           | -x, 1-y, 1-z          |
|               | N1-H1B...O2    | 0.89    | 2.11      | 2.906     | 148           | -1+x, y, z            |
|               | N1-H1B...O3    | 0.89    | 2.23      | 2.872     | 128           | -1+x, y, z            |
|               | N1-H1C...O7    | 0.89    | 2.08      | 2.958     | 168           | -x, 2-y, 1-z          |
|               | N2-H2A...O1    | 0.89    | 2.34      | 2.903     | 121           | -1+x, y, z            |
|               | N2-H2A...O2    | 0.89    | 2.25      | 3.053     | 150           | 1-x, 2-y, 1-z         |
|               | N2-H2B...O3    | 0.89    | 2.00      | 2.813     | 152           | 1-x, 1-y, 1-z         |
|               | N2-H2C...O10   | 0.89    | 1.92      | 2.806     | 175           | 1-x, 2-y, 1-z         |
|               | O9-H9...O6     | 0.78    | 2.23      | 2.963     | 155           | -x, 1-y, -z           |
|               | O10-H10A...O9  | 0.71    | 2.44      | 3.107     | 157           | x, 1+y, z             |
| O10-H10B...O8 | 0.69           | 2.35    | 2.920     | 141       |               |                       |
| 8             | N2-H2...O13    | 0.86    | 1.84      | 2.700     | 173           | 1+x,y,z               |

|                |      |      |        |     |                   |
|----------------|------|------|--------|-----|-------------------|
| N4-H4A···N19   | 0.86 | 2.09 | 2.947  | 173 | 1-x,-y,1-z        |
| N4-H4B···O11   | 0.86 | 2.05 | 2.754  | 138 |                   |
| N5-H5A···O6    | 0.86 | 2.20 | 3.055  | 170 | 2-x,-1/2+y,1/2-z  |
| N5-H5B···C11   | 0.86 | 2.67 | 3.4033 | 144 | 1-x,-y,1-z        |
| N6-H6A···N7    | 0.86 | 2.16 | 3.019  | 173 |                   |
| N6-H6B···N8    | 0.86 | 2.19 | 2.949  | 148 |                   |
| N9-H9···O5     | 0.86 | 1.94 | 2.782  | 165 | -1+x,y,z          |
| N10-H10A···N3  | 0.86 | 2.10 | 2.960  | 176 |                   |
| N10-H10B···O12 | 0.86 | 2.02 | 2.867  | 168 | -1+x,y,z          |
| N11-H11A···C11 | 0.86 | 2.41 | 3.240  | 162 | x,1/2-y,1/2+z     |
| N12-H12A···N13 | 0.86 | 2.15 | 3.006  | 179 | 1-x,1/2+y,1/2-z   |
| N12-H12B···O14 | 0.86 | 2.31 | 2.950  | 132 | -1+x,1/2-y,-1/2+z |
| O13-H13A···C11 | 0.85 | 2.27 | 3.096  | 163 | 1-x,-y,1-z        |
| O13-H13B···O2  | 0.85 | 1.98 | 2.756  | 152 | x,1/2-y,1/2+z     |
| N14-H14···O2   | 0.86 | 1.87 | 2.716  | 169 | x,1/2-y,1/2+z     |
| O14-H14A···N12 | 0.85 | 2.39 | 2.950  | 124 | 1+x,1/2-y,1/2+z   |
| O14-H14B···C11 | 0.85 | 2.73 | 3.348  | 130 | 1-x,-y,1-z        |
| N16-H16A···O14 | 0.86 | 2.27 | 3.101  | 164 | 2-x,-y,1-z        |
| N16-H16B···O3  | 0.86 | 2.07 | 2.856  | 151 | 1+x,1/2-y,1/2+z   |
| N17-H17A···N8  | 0.86 | 2.16 | 3.019  | 179 | 1-x,-1/2+y,1/2-z  |
| N17-H17B···C11 | 0.86 | 2.53 | 3.212  | 137 | 1-x,-y,1-z        |
| N18-H18A···N20 | 0.86 | 2.16 | 2.944  | 152 | 1+x,y,z           |
| N22-H22A···O11 | 0.86 | 2.12 | 2.980  | 176 | 1-x,-1/2+y,1/2-z  |
| N22-H22B···O10 | 0.86 | 1.96 | 2.804  | 168 | x,1/2-y,1/2+z     |
| N23-H23A···N1  | 0.86 | 2.14 | 2.997  | 173 | -x,1/2+y,1/2-z    |
| N23-H23B···O6  | 0.86 | 2.30 | 2.987  | 136 | -1+x,y,z          |
| N24-H24A···N15 | 0.86 | 2.20 | 3.057  | 177 | -1+x,y,z          |
| N24-H24B···O7  | 0.86 | 2.44 | 3.040  | 128 |                   |

**Figure S6.** IR curves of **1-8**

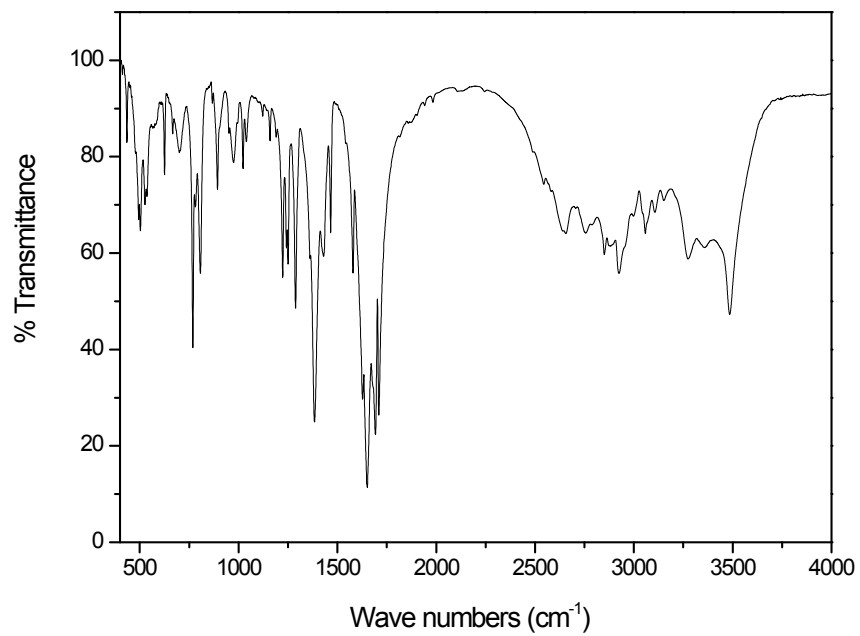

The IR curve of **1**

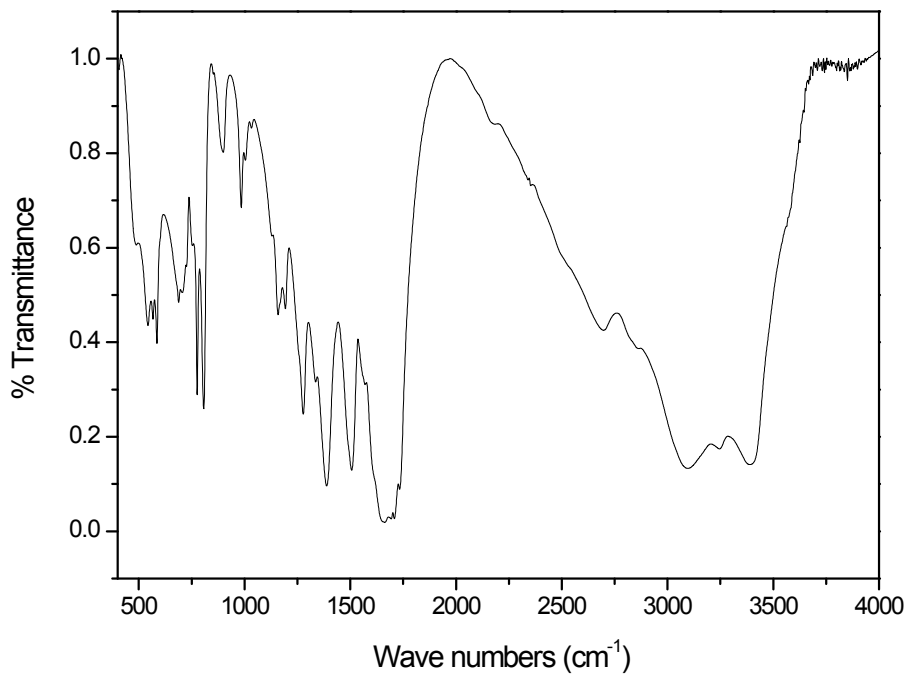

The IR curve of **2**

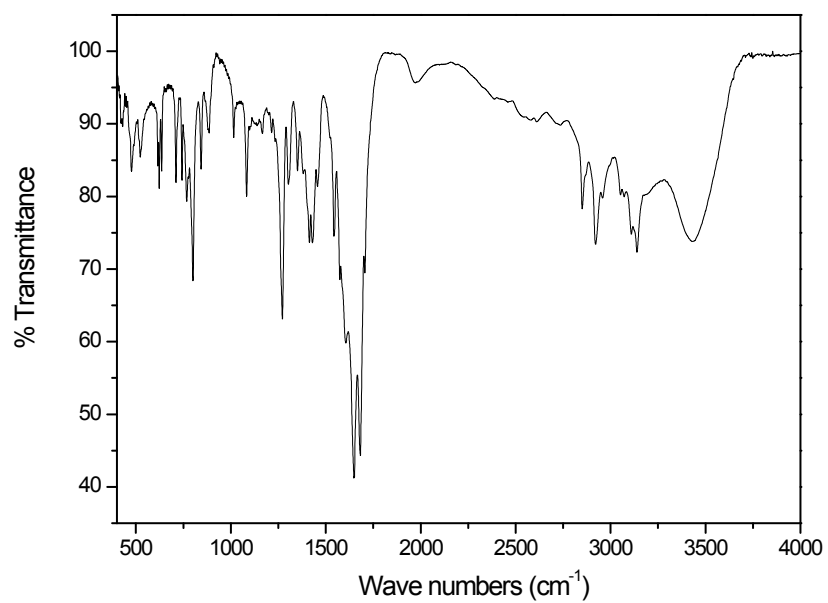

The IR curve of **3**

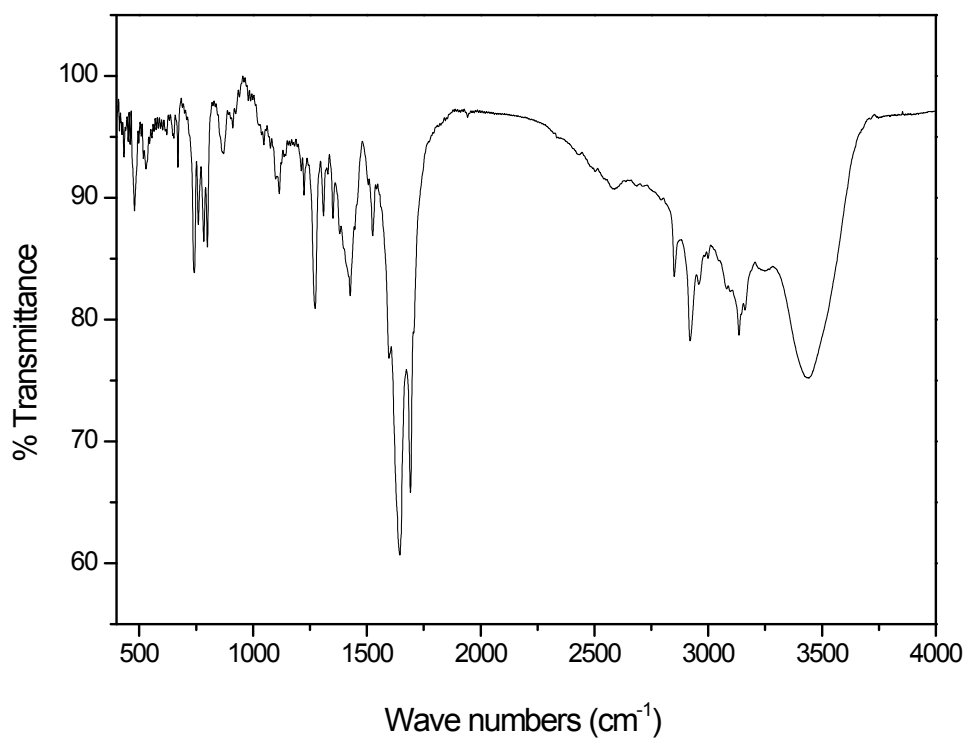

The IR curve of **4**

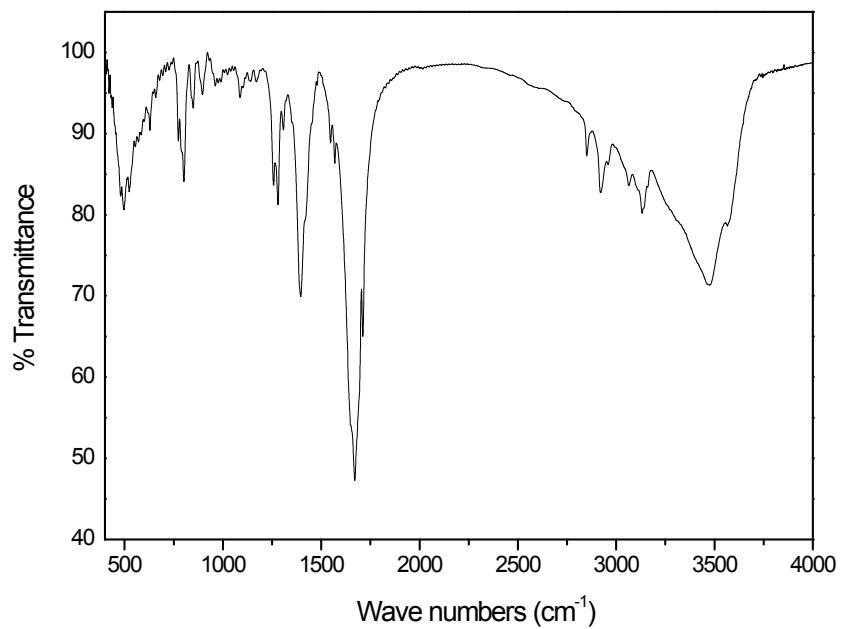

The IR curve of **5**

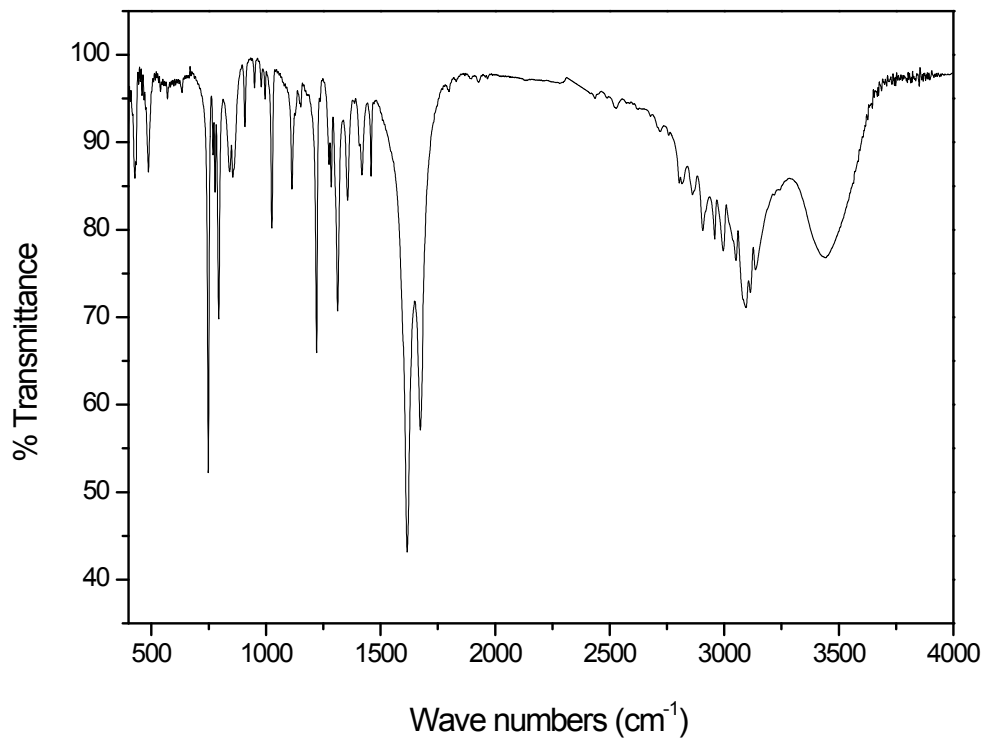

The IR curve of **6**

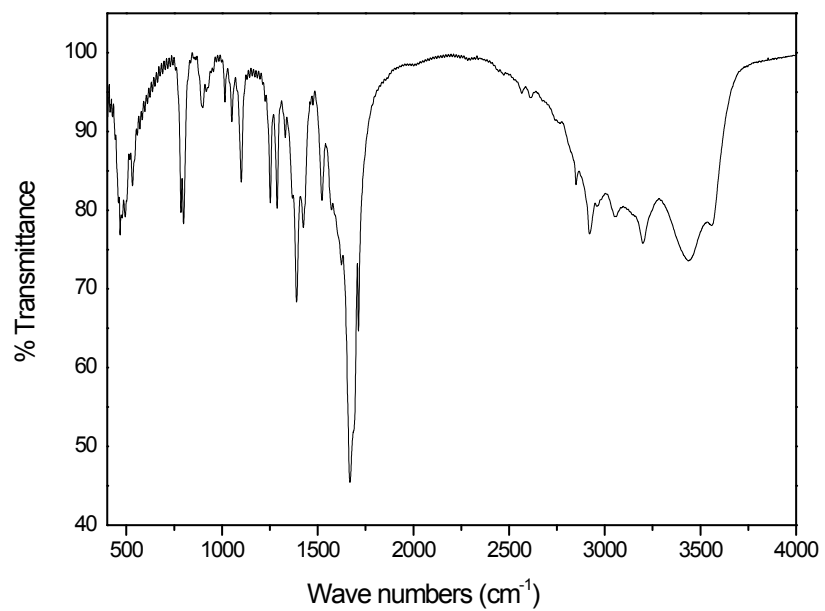

The IR curve of **7**

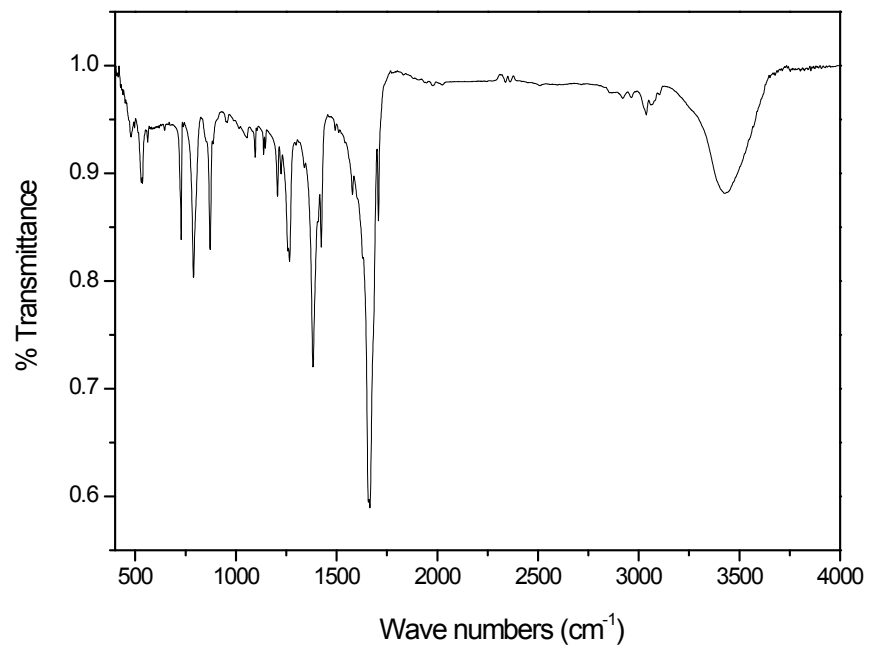

The IR curve of **8**
